# Supplementary material for: Effectiveness of cinacalcet treatment for secondary hyperparathyroidism on hospitalization: Results from the MBD-5D study
Source: PubMed Central journal article supplement (PMC6541241; doi:10.1371/journal.pone.0216399), 2019-05-29
Supplement: pone.0216399.s001.pdf [file pone.0216399.s001.pdf]

**S1 Table. Baseline characteristics of patients at study enrollment stratified by cinacalcet use status and iPTH levels.**

|                                               | iPTH < 200 pg/mL       |                         | 200 ≤ iPTH < 300 pg/mL  |                         | 300 ≤ iPTH < 500 pg/mL  |                         | iPTH ≥ 500 pg/mL        |                         | Overall                 |                         | P value <sup>a</sup> |
|-----------------------------------------------|------------------------|-------------------------|-------------------------|-------------------------|-------------------------|-------------------------|-------------------------|-------------------------|-------------------------|-------------------------|----------------------|
|                                               | Never Users            | Ever Users              | Never Users             | Ever Users              | Never Users             | Ever Users              | Never Users             | Ever Users              | Never Users             | Ever Users              |                      |
| <b>Number of patients</b>                     | 631                    | 250                     | 693                     | 374                     | 404                     | 420                     | 164                     | 340                     | 1,892                   | 1,384                   | -                    |
| <b>Age (mean [SD])</b>                        | 64.2 (12.8)            | 58.7 (12.4)             | 64.5 (12.8)             | 59.4 (11.6)             | 64.0 (13.3)             | 59.1 (11.9)             | 62.6 (12.4)             | 58.3 (11.4)             | 64.1 (12.9)             | 58.9 (11.8)             | <0.001               |
| <b>Male (%)</b>                               | 60.9                   | 66.8                    | 65.7                    | 57.2                    | 62.6                    | 56.0                    | 57.9                    | 62.4                    | 62.7                    | 59.8                    | 0.098                |
| <b>Primary Disease (%)</b>                    |                        |                         |                         |                         |                         |                         |                         |                         |                         |                         | <0.001               |
| <b>Chronic Glomerulonephritis</b>             | 38.0                   | 52.4                    | 36.5                    | 48.7                    | 36.9                    | 53.1                    | 56.7                    | 58.5                    | 38.8                    | 53.1                    |                      |
| <b>Diabetic Nephropathy</b>                   | 33.6                   | 17.2                    | 32.5                    | 19.5                    | 26.5                    | 16.0                    | 16.5                    | 11.2                    | 30.2                    | 16.0                    |                      |
| <b>Dialysis vintage, years (median [IQR])</b> | 5.5<br>(2.5, 10.8)     | 9.2<br>(5.5, 15.6)      | 5.1<br>(2.4, 10.7)      | 10.0<br>(6.4, 15.1)     | 5.9<br>(2.5, 11.0)      | 11.4<br>(7.3, 17.5)     | 9.5<br>(5.5, 14.9)      | 12.7<br>(8.2, 19.1)     | 5.8<br>(2.5, 11.4)      | 11.0<br>(6.8, 16.8)     | <0.001               |
| <b>BMI, kg/m<sup>2</sup> (mean [SD])</b>      | 21.2 (3.6)             | 21.5 (3.1)              | 21.4 (3.8)              | 21.3 (3.1)              | 21.3 (4.1)              | 21.6 (3.6)              | 20.9 (3.2)              | 21.4 (3.4)              | 21.3 (3.8)              | 21.5 (3.3)              | 0.177                |
| <b>Coronary Artery Disease (%)</b>            | 27.7                   | 23.1                    | 28.2                    | 23.6                    | 25.2                    | 22.8                    | 29.3                    | 21.1                    | 27.5                    | 22.7                    | 0.002                |
| <b>Congestive Heart Failure (%)</b>           | 9.0                    | 10.2                    | 9.4                     | 6.0                     | 9.9                     | 4.8                     | 7.5                     | 5.1                     | 9.2                     | 6.2                     | 0.002                |
| <b>Peripheral Vascular Disease (%)</b>        | 21.3                   | 17.9                    | 20.2                    | 17.2                    | 19.5                    | 17.3                    | 20.5                    | 16.4                    | 20.5                    | 17.2                    | 0.021                |
| <b>Diabetes Mellitus (%)</b>                  | 41.7                   | 24.2                    | 40.9                    | 26.3                    | 36.0                    | 22.2                    | 26.4                    | 13.9                    | 38.9                    | 21.6                    | <0.001               |
| <b>History of parathyroidectomy (%)</b>       | 4.1                    | 4.9                     | 4.6                     | 6.9                     | 3.1                     | 10.2                    | 10.8                    | 10.0                    | 4.7                     | 8.3                     | <0.001               |
| <b>Laboratory data</b>                        |                        |                         |                         |                         |                         |                         |                         |                         |                         |                         |                      |
| <b>iPTH, pg/mL (median [IQR])</b>             | 143.0<br>(88.0, 185.0) | 157.5<br>(117.9, 184.0) | 240.0<br>(217.0, 265.2) | 251.0<br>(227.8, 276.0) | 361.5<br>(326.0, 408.2) | 382.5<br>(345.1, 430.0) | 680.5<br>(565.8, 888.3) | 696.1<br>(573.8, 889.2) | 236.3<br>(185.0, 324.0) | 327.0<br>(228.5, 495.5) | <0.001               |
| <b>Calcium, mg/dL (mean [SD])</b>             | 9.4 (0.8)              | 10.1 (0.7)              | 9.0 (0.8)               | 9.9 (0.7)               | 9.0 (0.8)               | 9.8 (0.7)               | 9.3 (1.0)               | 9.8 (0.8)               | 9.1 (0.8)               | 9.9 (0.7)               | <0.001               |
| <b>Phosphate, mg/dL (mean [SD])</b>           | 5.2 (1.3)              | 5.4 (1.2)               | 5.2 (1.3)               | 5.5 (1.2)               | 5.6 (1.4)               | 5.9 (1.3)               | 6.0 (1.6)               | 6.2 (1.5)               | 5.4 (1.4)               | 5.8 (1.3)               | <0.001               |
| <b>Albumin, g/dL (mean [SD])</b>              | 3.7 (0.4)              | 3.8 (0.4)               | 3.7 (0.4)               | 3.8 (0.4)               | 3.7 (0.4)               | 3.8 (0.4)               | 3.7 (0.4)               | 3.8 (0.4)               | 3.7 (0.4)               | 3.8 (0.4)               | <0.001               |
| <b>Kt/V (mean [SD])</b>                       | 1.4 (0.3)              | 1.5 (0.3)               | 1.4 (0.3)               | 1.5 (0.3)               | 1.4 (0.3)               | 1.5 (0.3)               | 1.5 (0.3)               | 1.4 (0.3)               | 1.4 (0.3)               | 1.5 (0.3)               | <0.001               |
| <b>Dialysate Calcium, mEq/L (mean [SD])</b>   | 2.7 (0.2)              | 2.8 (0.2)               | 2.8 (0.2)               | 2.8 (0.2)               | 2.8 (0.2)               | 2.8 (0.3)               | 2.8 (0.3)               | 2.8 (0.3)               | 2.8 (0.2)               | 2.8 (0.2)               | 0.004                |
| <b>Vitamin D Receptor Agonist (%)</b>         |                        |                         |                         |                         |                         |                         |                         |                         |                         |                         | <0.001               |
| <b>Both</b>                                   | 0.0                    | 0.0                     | 0.3                     | 0.0                     | 0.0                     | 0.0                     | 0.0                     | 0.3                     | 0.1                     | 0.1                     |                      |
| <b>Intravenous Only</b>                       | 54.5                   | 67.6                    | 26.3                    | 52.1                    | 28.7                    | 61.4                    | 53.7                    | 71.5                    | 38.6                    | 62.5                    |                      |
| <b>Oral Only</b>                              | 32.5                   | 22.4                    | 39.7                    | 32.4                    | 37.1                    | 17.4                    | 22.0                    | 7.1                     | 35.2                    | 19.8                    |                      |
| <b>Phosphate Binder (%)</b>                   |                        |                         |                         |                         |                         |                         |                         |                         |                         |                         | <0.001               |
| <b>Both</b>                                   | 20.4                   | 37.6                    | 17.1                    | 29.9                    | 19.6                    | 26.2                    | 22.6                    | 24.8                    | 19.2                    | 28.9                    |                      |
| <b>Non-Calcium-based Only</b>                 | 9.8                    | 17.6                    | 9.7                     | 24.9                    | 8.2                     | 31.9                    | 24.4                    | 38.1                    | 10.7                    | 28.9                    |                      |
| <b>Calcium-based Only</b>                     | 54.7                   | 37.6                    | 52.4                    | 35.8                    | 51.0                    | 32.6                    | 32.9                    | 28.0                    | 51.2                    | 33.3                    |                      |
| <b>Number of hospitalization (%)</b>          |                        |                         |                         |                         |                         |                         |                         |                         |                         |                         |                      |
| <b>All-cause</b>                              | 62.4                   | 57.6                    | 63.6                    | 57.5                    | 67.6                    | 57.4                    | 70.7                    | 62.6                    | 64.7                    | 58.7                    | 0.001                |
| <b>Cardiovascular-Related</b>                 | 19.5                   | 19.2                    | 24.0                    | 22.2                    | 28.7                    | 19.5                    | 28.0                    | 25.0                    | 23.8                    | 21.5                    | 0.131                |
| <b>Infection-Related</b>                      | 12.5                   | 6.4                     | 15.0                    | 12.8                    | 18.8                    | 11.7                    | 9.8                     | 9.7                     | 14.5                    | 10.5                    | 0.001                |
| <b>Vascular Access-Related</b>                | 14.1                   | 13.6                    | 13.3                    | 15.8                    | 14.6                    | 13.8                    | 10.4                    | 13.8                    | 13.6                    | 14.3                    | 0.589                |

BMI, body mass index; iPTH, intact parathyroid hormone; IQR, interquartile range; SD, standard deviation

<sup>a</sup>Differences were evaluated by unpaired t-test or Mann-Whitney U-test for continuous variables and by chi-square test for categorical variables.
