# Supplementary material for: Effectiveness of cinacalcet treatment for secondary hyperparathyroidism on hospitalization: Results from the MBD-5D study
Source: PubMed Central journal article supplement (PMC6541241; doi:10.1371/journal.pone.0216399), 2019-05-29
Supplement: pone.0216399.s008.pdf [file pone.0216399.s008.pdf]

**S2 Fig. Individual trajectories of stabilized weights.**

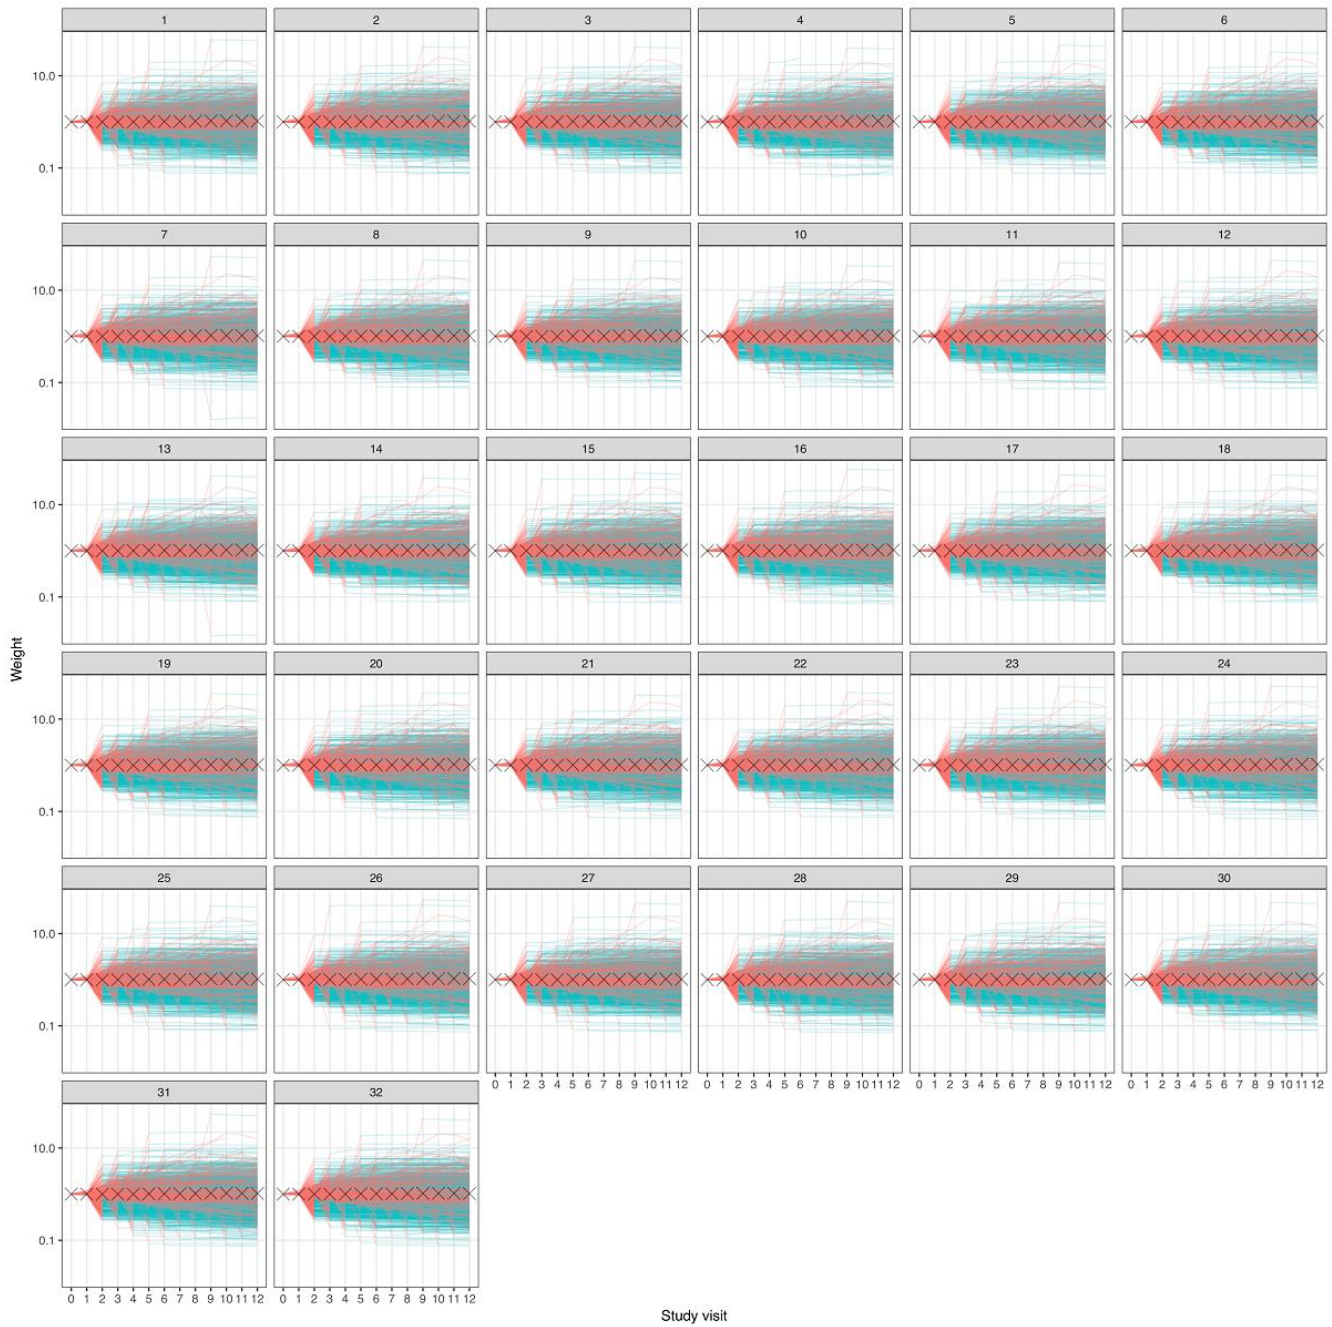

Each panel represents a single imputation dataset (32 in total). The X-axis represents the study visits. The Y-axis is the weights ( $\log_{10}$  scale). All individual trajectories started in red (not initiated on cinacalcet) and changed to green once initiated on cinacalcet. The crosses ( $\times$ ) represent the mean at each time point, indicating that the mean was close to the ideal value of 1.0 in all datasets.
